# Supplementary material
Source: PubMed Central journal article supplement (PMC10776106)
Supplement: NIHMS1953794-supplement-Supplementary_tables_and_figures.pdf [file NIHMS1953794-supplement-Supplementary_tables_and_figures.pdf]

**1 Supplementary Data**

All relevant data are contained within the article and supplementary material (**Supplementary Data 2**). Any further details are available upon request.

**2 Supplementary Tables**

**Supplementary Table S1.** Gating strategy for immune cell populations detected by mass cytometry.

| Immune Cell Population | Gating Strategy                                                                                 | Passed Filtering? | Lineage Parent Population |
|------------------------|-------------------------------------------------------------------------------------------------|-------------------|---------------------------|
| Granulocytes           | CD45loCD66b+                                                                                    | YES               | Live, Singlets            |
| Neutrophils            | CD45loCD66b+, CD294-CD16+                                                                       | YES               | Granulocytes              |
| Eosinophils            | CD45loCD66b+, CD294+CD16-                                                                       | YES               | Granulocytes              |
| Basophils              | CD45+CD66b-, CD19-CD20-, CD3-CD56-, HLA-DR-CD11c-, CD123+CD294+                                 | YES               | Granulocytes              |
| Lymphocytes            | CD45+CD66b-                                                                                     | YES               | Live, Singlets            |
| Total B Cells          | CD45+CD66b-, CD56-CD14-, CD19+CD3-                                                              | YES               | Lymphocytes               |
| Naive B Cells          | CD45+CD66b-, CD56-CD14-, CD19+CD3-, CD19+CD27-                                                  | YES               | Total B Cells             |
| Total Memory B Cells   | CD45+CD66b-, CD56-CD14-, CD19+CD3-, CD19+CD27+                                                  | YES               | Total B Cells             |
| Plasmablasts           | CD45+CD66b-, CD56-CD14-, CD19+CD3-, CD19+CD27+, CD38+CD20-                                      | NO                | Total B Cells             |
| Naive B Cells (IgD+/-) | CD45+CD66b-, CD56-CD14-, CD19+CD3-, CD27-IgD+/-                                                 | YES               | Total B Cells             |
| IgD- Memory B Cells    | CD45+CD66b-, CD56-CD14-, CD19+CD3-, CD27+IgD-                                                   | YES               | Total B Cells             |
| IgD+ Memory B Cells    | CD45+CD66b-, CD56-CD14-, CD19+CD3-, CD27+IgD+                                                   | NO                | Total B Cells             |
| Total Monocytes        | CD45+CD66b-, CD19-CD20-, CD3-CD56-, CD11c+HLA-DR+, CD14+/-CD11c+                                | YES               | Lymphocytes               |
| Classical Monocytes    | CD45+CD66b-, CD19-CD20-, CD3-CD56-, CD11c+HLA-DR+, CD14+/-CD11c+, CD38+CD14hi, CD14hiCD16lo/-   | YES               | Total Monocytes           |
| Transitional Monocytes | CD45+CD66b-, CD19-CD20-, CD3-CD56-, CD11c+HLA-DR+, CD14+/-CD11c+, CD38lo/-CD14int, CD14intCD16+ | YES               | Total Monocytes           |
| Nonclassical Monocytes | CD45+CD66b-, CD19-CD20-, CD3-CD56-, CD11c+HLA-DR+, CD14+/-CD11c+, CD38-CD14-, CD14-CD16+        | YES               | Total Monocytes           |
| mDC                    | CD45+CD66b-, CD19-CD20-, CD3-CD14-, HLA-DR+, CD123-CD11c+, CD38+                                | YES               | mDC + pDC                 |
| pDC                    | CD45+CD66b-, CD19-CD20-, CD3-CD14-, HLA-DR+, CD123+CD11c-                                       | NO                | mDC + pDC                 |
| Total NK               | CD45+CD66b-, CD19-CD20-, CD3-CD14-, CD45RA+CD123-, CD45+CD56+                                   | YES               | Lymphocytes               |
| Late NKs               | CD45+CD66b-, CD19-CD20-, CD3-CD14-, CD45RA+CD123-, CD45+CD56+, CD56+CD57+                       | YES               | Total NK                  |
| Early NKs              | CD45+CD66b-, CD19-CD20-, CD3-CD14-, CD45RA+CD123-, CD45+CD56+, CD56+CD57-                       | YES               | Total NK                  |

| Immune Cell Population            | Gating Strategy                                                                                                                 | Passed Filtering? | Lineage Parent Population |
|-----------------------------------|---------------------------------------------------------------------------------------------------------------------------------|-------------------|---------------------------|
| Total T Cells                     | CD45+CD66b-, CD19-CD20-, CD14-CD11c-, CD45+CD3+                                                                                 | YES               | Lymphocytes               |
| Gamma Delta T Cells               | CD45+CD66b-, CD19-CD20-, CD14-CD11c-, CD45+CD3+, CD4-CD8-, CD3+TCR $\gamma\delta$ +                                             | YES               | Total T Cells             |
| MAIT / NKT Cells                  | CD45+CD66b-, CD19-CD20-, CD14-CD11c-, CD45+CD3+, CD3+TCR $\gamma\delta$ -, CD3+CD4-, CD28+CD161hi                               | YES               | Total T Cells             |
| CD3+ ab T cells                   | CD45+CD66b-, CD19-CD20-, CD14-CD11c-, CD45+CD3+, CD3+TCR $\gamma\delta$ -                                                       | YES               | Total T Cells             |
| CD8 ab T Cells                    | CD45+CD66b-, CD19-CD20-, CD14-CD11c-, CD45+CD3+, CD3+TCR $\gamma\delta$ -, CD4-CD8+, CD8+CD161lo/-                              | YES               | Total T Cells             |
| CD8 Naive                         | CD45+CD66b-, CD19-CD20-, CD14-CD11c-, CD45+CD3+, CD3+TCR $\gamma\delta$ -, CD4-CD8+, CD8+CD161lo/-, CD8+CCR7hi, CD45RA+CD45RO-  | YES               | CD8 ab T Cells            |
| CD8 Central Memory                | CD45+CD66b-, CD19-CD20-, CD14-CD11c-, CD45+CD3+, CD3+TCR $\gamma\delta$ -, CD4-CD8+, CD8+CD161lo/-, CD8+CCR7hi, CD45RA-CD45RO+  | NO                | CD8 ab T Cells            |
| CD8 Effector Memory               | CD45+CD66b-, CD19-CD20-, CD14-CD11c-, CD45+CD3+, CD3+TCR $\gamma\delta$ -, CD4-CD8+, CD8+CD161lo/-, CD8+CCR7lo/-, CD8+CD27+     | YES               | CD8 ab T Cells            |
| CD8 Terminal Effector             | CD45+CD66b-, CD19-CD20-, CD14-CD11c-, CD45+CD3+, CD3+TCR $\gamma\delta$ -, CD4-CD8+, CD8+CD161lo/-, CD8+CCR7lo/-, CD8+CD27-     | YES               | CD8 ab T Cells            |
| TEMRA CD8+ T cells                | CD45+CD66b-, CD19-CD20-, CD14-CD11c-, CD45+CD3+, CD3+TCR $\gamma\delta$ -, CD4-CD8+, CD8+CD161lo/-, CD45RA+CCR7-, CD28-CCR7-    | YES               | CD8 ab T Cells            |
| Activated CD8+ T cells            | CD45+CD66b-, CD19-CD20-, CD14-CD11c-, CD45+CD3+, CD3+TCR $\gamma\delta$ -, CD4-CD8+, CD8+CD161lo/-, HLA-DR+CD38+                | YES               | CD8 ab T Cells            |
| Activated, Senescent CD8+ T cells | CD45+CD66b-, CD19-CD20-, CD14-CD11c-, CD45+CD3+, CD3+TCR $\gamma\delta$ -, CD4-CD8+, CD8+CD161lo/-, HLA-DR+CD38+, CD28-         | NO                | CD8 ab T Cells            |
| Exhausted CD8+ T cells            | CD45+CD66b-, CD19-CD20-, CD14-CD11c-, CD45+CD3+, CD3+TCR $\gamma\delta$ -, CD4-CD8+, CD8+CD161lo/-, CD8+CD28-, PD-1+TIGIT+      | NO                | CD8 ab T Cells            |
| CD4 ab T Cells                    | CD45+CD66b-, CD19-CD20-, CD14-CD11c-, CD45+CD3+, CD3+TCR $\gamma\delta$ -, CD4+CD8-                                             | YES               | Total T Cells             |
| CD4 Naive                         | CD45+CD66b-, CD19-CD20-, CD14-CD11c-, CD45+CD3+, CD3+TCR $\gamma\delta$ -, CD4+CD8-, CD4+CCR7hi, CD45RA+CD45RO-                 | YES               | CD4 ab T Cells            |
| CD4 Central Memory                | CD45+CD66b-, CD19-CD20-, CD14-CD11c-, CD45+CD3+, CD3+TCR $\gamma\delta$ -, CD4+CD8-, CD4+CCR7hi, CD45RA-CD45RO+                 | YES               | CD4 ab T Cells            |
| CD4 Effector Memory               | CD45+CD66b-, CD19-CD20-, CD14-CD11c-, CD45+CD3+, CD3+TCR $\gamma\delta$ -, CD4+CD8-, CD4+CCR7lo/-, CD45RA-CD45RO+, CD45RO+CD27+ | YES               | CD4 ab T Cells            |
| CD4 Terminal Effectors            | CD45+CD66b-, CD19-CD20-, CD14-CD11c-, CD45+CD3+, CD3+TCR $\gamma\delta$ -, CD4+CD8-, CD4+CCR7lo/-, CD45RA-CD45RO+, CD45RO+CD27- | YES               | CD4 ab T Cells            |
| Th1-like                          | CD45+CD66b-, CD19-CD20-, CD14-CD11c-, CD45+CD3+, CD3+TCR $\gamma\delta$ -, CD4+CD8-, CD4+CCR4-, CD45RA-CD45RO+, CXCR3+CCR6-     | YES               | CD4 ab T Cells            |
| Th2-like                          | CD45+CD66b-, CD19-CD20-, CD14-CD11c-, CD45+CD3+, CD3+TCR $\gamma\delta$ -, CD4+CD8-, CD4+CXCR5-, CD45RA-CCR4+, CXCR3-CCR6-      | YES               | CD4 ab T Cells            |
| Th17-like                         | CD45+CD66b-, CD19-CD20-, CD14-CD11c-, CD45+CD3+, CD3+TCR $\gamma\delta$ -, CD4+CD8-, CD4+CXCR5-, CD45RA-CCR4+, CXCR3-CCR6+      | YES               | CD4 ab T Cells            |
| Treg                              | CD45+CD66b-, CD19-CD20-, CD14-CD11c-, CD45+CD3+, CD3+TCR $\gamma\delta$ -, CD4+CD8-, CD4+CCR4+, CD45RA-CD45RO+, CD25hiCD127lo/- | YES               | CD4 ab T Cells            |
| Activated CD4+ T cells            | CD45+CD66b-, CD19-CD20-, CD14-CD11c-, CD45+CD3+, CD3+TCR $\gamma\delta$ -, CD4+CD8-, HLA-DR+CD38+                               | YES               | CD4 ab T Cells            |
| Activated, Senescent CD4+ T cells | CD45+CD66b-, CD19-CD20-, CD14-CD11c-, CD45+CD3+, CD3+TCR $\gamma\delta$ -, CD4+CD8-, HLA-DR+CD38+, CD28-                        | NO                | CD4 ab T Cells            |
| Exhausted CD4+ T cells            | CD45+CD66b-, CD19-CD20-, CD14-CD11c-, CD45+CD3+, CD3+TCR $\gamma\delta$ -, CD4+CD8-, CD28-, PD-1+TIGIT+                         | NO                | CD4 ab T Cells            |
| TEMRA CD4+ T cells                | CD45+CD66b-, CD19-CD20-, CD14-CD11c-, CD45+CD3+, CD3+TCR $\gamma\delta$ -, CD4+CD8-, CD45RA+CCR7-, CD28-                        | NO                | CD4 ab T Cells            |

**Supplementary Table S2.** Antibody clones and mass tags used for mass cytometry experiments.

| <b>Antibody</b>      | <b>Clone</b> | <b>Mass</b> | <b>Kit Cat. No.</b> |
|----------------------|--------------|-------------|---------------------|
| CD279/PD-1           | EH12.2H7     | 175Lu       | 201405              |
| TIGIT                | MBSA43       | 209Bi       | 201405              |
| CD45                 | HI30         | 89Y         | 201325              |
| CD196/CCR6           | G034E3       | 141Pr       | 201325              |
| CD123                | 6H6          | 143Nd       | 201325              |
| CD19                 | HIB19        | 144Nd       | 201325              |
| CD4                  | RPA-T4       | 145Nd       | 201325              |
| CD8a                 | RPA-T8       | 146Nd       | 201325              |
| CD11c                | Bu15         | 147Sm       | 201325              |
| CD16                 | 3G8          | 148Nd       | 201325              |
| CD45RO               | UCHL1        | 149Sm       | 201325              |
| CD45RA               | HI100        | 150Nd       | 201325              |
| CD161                | HP-3G10      | 151Eu       | 201325              |
| CD194/CCR4           | L291H4       | 152Sm       | 201325              |
| CD25                 | BC96         | 153Eu       | 201325              |
| CD27                 | O323         | 154Sm       | 201325              |
| CD57                 | HCD57        | 155Gd       | 201325              |
| CD183/CXCR3          | G025H7       | 156Gd       | 201325              |
| CD185/CXCR5          | J252D4       | 158Gd       | 201325              |
| CD28                 | CD28.2       | 160Gd       | 201325              |
| CD38                 | HB-7         | 161Dy       | 201325              |
| CD56/NCAM            | NCAM16.2     | 163Dy       | 201325              |
| TCR $\gamma\delta$   | B1           | 164Dy       | 201325              |
| CD294                | BM16         | 166Er       | 201325              |
| CD197/CCR7           | G043H7       | 167Er       | 201325              |
| CD14                 | 63D3         | 168Er       | 201325              |
| CD3                  | UCHT1        | 170Er       | 201325              |
| CD20                 | 2H7          | 171Yb       | 201325              |
| CD66b                | G10F5        | 172Yb       | 201325              |
| HLA-DR               | LN3          | 173Yb       | 201325              |
| IgD                  | IA6-2        | 174Yb       | 201325              |
| CD127                | A019D5       | 176Yb       | 201325              |
| Cell-ID Intercalator | N/A          | 103Rh       | 201325              |

**Supplementary Table S3.** Results of ANCOVA and Two-Way ANOVA for comparison of inflammatory mediators and cellular immunophenotypes across the groups. If the p-value correction resulted in a  $p > 1$ , then the  $p$  was set to 1.

| Variable  | HIV-CON                  |                | IDU-CON                  |                | DP-CON                   |                | IDU-HIV                  |                | DP-HIV                   |                | DP-IDU                   |                | HIV                  |                     | IDU                  |                     | Interaction          |                     |
|-----------|--------------------------|----------------|--------------------------|----------------|--------------------------|----------------|--------------------------|----------------|--------------------------|----------------|--------------------------|----------------|----------------------|---------------------|----------------------|---------------------|----------------------|---------------------|
|           | Mean Estimate Difference | ANCOVA p-value | Coefficient Estimate | 2-Way ANOVA p-value | Coefficient Estimate | 2-Way ANOVA p-value | Coefficient Estimate | 2-Way ANOVA p-value |
| 4E.BP1    | 0.2703                   | 1              | 0.1628                   | 1              | -0.1383                  | 1              | -0.1075                  | 1              | -0.4086                  | 1              | -0.3011                  | 1              | 0.2703               | 1                   | 0.1628               | 1                   | 0.0172               | 0.4972              |
| ADA       | 0.2028                   | 1              | 0.3060                   | 1              | 0.3486                   | 1              | 0.1032                   | 1              | 0.1458                   | 1              | 0.0426                   | 1              | 0.2028               | 0.9095              | 0.3060               | 0.5800              | 0.0057               | 1                   |
| AXIN1     | -0.1976                  | 1              | -0.2490                  | 1              | -0.8637                  | 0.1837         | -0.0514                  | 1              | -0.6660                  | 0.2320         | -0.6146                  | 0.2729         | -0.1976              | 1                   | -0.2490              | 1                   | 0.0032               | 1                   |
| CASP.8    | 0.5246                   | 0.2783         | 0.0411                   | 1              | 0.1118                   | 1              | -0.4835                  | 0.1521         | -0.4129                  | 0.8241         | 0.0706                   | 1              | 0.5246               | 0.1486              | 0.0411               | 1                   | 0.0134               | 0.6963              |
| CCL11     | 0.5192                   | 0.0171         | 0.5734                   | 0.0419         | 0.4789                   | 0.2129         | 0.0542                   | 1              | -0.0403                  | 1              | -0.0945                  | 1              | 0.5192               | 0.0111              | 0.5734               | 0.0209              | 0.0174               | 0.0603              |
| CCL19     | 1.0558                   | 0.0243         | 0.9890                   | 0.1583         | 1.2556                   | 0.0539         | -0.0668                  | 1              | 0.1998                   | 1              | 0.2666                   | 1              | 1.0558               | 0.0152              | 0.9890               | 0.0792              | -0.0004              | 1                   |
| CCL20     | 1.5864                   | 0.0018         | 2.0134                   | 0.0013         | 2.2862                   | 0.0004         | 0.4270                   | 1              | 0.6998                   | 0.7813         | 0.2728                   | 1              | 1.5864               | 0.0015              | 2.0134               | 0.0007              | 0.0019               | 1                   |
| CCL23     | 0.4326                   | 0.3220         | 0.3117                   | 1              | 0.4287                   | 0.8631         | -0.1209                  | 1              | -0.0038                  | 1              | 0.1170                   | 1              | 0.4326               | 0.1708              | 0.3117               | 0.7400              | -0.0080              | 1                   |
| CCL25     | 0.4167                   | 0.2370         | 0.3592                   | 0.8407         | 0.7660                   | 0.0229         | -0.0575                  | 1              | 0.3493                   | 0.6110         | 0.4068                   | 0.2749         | 0.4167               | 0.1275              | 0.3592               | 0.4204              | 0.0110               | 0.5999              |
| CCL28     | 0.1038                   | 1              | 0.0546                   | 1              | -0.0294                  | 1              | -0.0492                  | 1              | -0.1332                  | 1              | -0.0840                  | 1              | 0.1038               | 1                   | 0.0546               | 1                   | 0.0121               | 0.1250              |
| CCL3      | 0.7862                   | 0.0426         | 0.8466                   | 0.1024         | 1.0098                   | 0.0493         | 0.0604                   | 1              | 0.2237                   | 1              | 0.1632                   | 1              | 0.7862               | 0.0255              | 0.8466               | 0.0512              | 0.0280               | 0.0756              |
| CCL4      | 0.2156                   | 1              | 0.2747                   | 1              | 0.3750                   | 1              | 0.0591                   | 1              | 0.1595                   | 1              | 0.1003                   | 1              | 0.2156               | 1                   | 0.2747               | 1                   | 0.0067               | 1                   |
| CD244     | 0.2408                   | 0.5623         | -0.0485                  | 1              | 0.2628                   | 0.9732         | -0.2894                  | 0.0866         | 0.0220                   | 1              | 0.3113                   | 0.1899         | 0.2408               | 0.2919              | -0.0485              | 1                   | 0.0039               | 1                   |
| CD40      | -0.0231                  | 1              | 0.0422                   | 1              | 0.0645                   | 1              | 0.0653                   | 1              | 0.0876                   | 1              | 0.0223                   | 1              | -0.0231              | 1                   | 0.0422               | 1                   | 0.0136               | 0.0280              |
| CD5       | 0.4609                   | 0.0764         | 0.2706                   | 1              | 0.5334                   | 0.1654         | -0.1903                  | 1              | 0.0725                   | 1              | 0.2629                   | 0.9343         | 0.4609               | 0.0439              | 0.2706               | 0.6699              | -0.0092              | 0.7184              |
| CD6       | 0.6468                   | 0.0477         | 0.1940                   | 1              | 0.8965                   | 0.0296         | -0.4528                  | 0.1419         | 0.2496                   | 1              | 0.7025                   | 0.0279         | 0.6468               | 0.0283              | 0.1940               | 1                   | -0.0035              | 1                   |
| CD8A      | 1.0174                   | 0.0003         | 0.5030                   | 0.5898         | 0.9482                   | 0.0246         | -0.5144                  | 0.0802         | -0.0691                  | 1              | 0.4453                   | 0.4737         | 1.0174               | 0.0004              | 0.5030               | 0.2949              | 0.0037               | 1                   |
| CDCP1     | 0.8642                   | 0.0103         | 1.1226                   | 0.0058         | 1.7255                   | 0.0000         | 0.2584                   | 1              | 0.8613                   | 0.0184         | 0.6029                   | 0.1809         | 0.8642               | 0.0070              | 1.1226               | 0.0029              | 0.0211               | 0.2192              |
| CSF.1     | 0.2690                   | 0.0152         | 0.3758                   | 0.0039         | 0.4018                   | 0.0034         | 0.1068                   | 0.8448         | 0.1327                   | 0.9471         | 0.0259                   | 1              | 0.2690               | 0.0100              | 0.3758               | 0.0019              | 0.0038               | 0.9534              |
| CST5      | 0.0729                   | 1              | -0.1281                  | 1.0000         | 0.2669                   | 1              | -0.2010                  | 1              | 0.1940                   | 1              | 0.3950                   | 0.1888         | 0.0729               | 1                   | -0.1281              | 1                   | 0.0086               | 0.8005              |
| CX3CL1    | 0.2724                   | 0.4544         | 0.4528                   | 0.0912         | 0.5452                   | 0.0396         | 0.1804                   | 0.8903         | 0.2728                   | 0.5509         | 0.0924                   | 1              | 0.2724               | 0.2377              | 0.4528               | 0.0456              | 0.0094               | 0.4530              |
| CXCL1     | -0.0980                  | 1              | 0.1281                   | 1              | -0.9319                  | 0.1804         | 0.2261                   | 1              | -0.8339                  | 0.0964         | -1.0600                  | 0.0097         | -0.0980              | 1                   | 0.1281               | 1                   | 0.0239               | 0.2636              |
| CXCL10    | 1.2558                   | 0.0203         | 0.8323                   | 0.6417         | 1.5228                   | 0.0397         | -0.4236                  | 1              | 0.2670                   | 1              | 0.6906                   | 0.6477         | 1.2558               | 0.0130              | 0.8323               | 0.3209              | 0.0317               | 0.2479              |
| CXCL11    | 1.0539                   | 0.1179         | 0.8574                   | 0.6900         | 1.0547                   | 0.4463         | -0.1965                  | 1              | 0.0008                   | 1              | 0.1972                   | 1              | 1.0539               | 0.0659              | 0.8574               | 0.3450              | 0.0113               | 1                   |
| CXCL5     | 0.1488                   | 1              | 0.2665                   | 1              | -0.5958                  | 1              | 0.1177                   | 1              | -0.7446                  | 0.4182         | -0.8623                  | 0.1683         | 0.1488               | 1                   | 0.2665               | 1                   | 0.0409               | 0.0434              |
| CXCL6     | 0.0928                   | 1              | 0.3429                   | 1              | -0.0815                  | 1              | 0.2501                   | 1              | -0.1743                  | 1              | -0.4245                  | 1              | 0.0928               | 1                   | 0.3429               | 1                   | 0.0159               | 0.7492              |
| CXCL9     | 1.4044                   | 0.0001         | 0.6061                   | 0.6851         | 1.2419                   | 0.0174         | -0.7983                  | 0.0154         | -0.1625                  | 1              | 0.6358                   | 0.2844         | 1.4044               | 0.0001              | 0.6061               | 0.3426              | 0.0210               | 0.3653              |
| DNER      | -0.0190                  | 1              | 0.1503                   | 0.9151         | 0.1487                   | 1              | 0.1693                   | 0.1105         | 0.1677                   | 0.4136         | -0.0017                  | 1              | -0.0190              | 1                   | 0.1503               | 0.4575              | -0.0001              | 1                   |
| EN.RAGE   | 0.0555                   | 1              | 0.1267                   | 1              | 0.2499                   | 1              | 0.0712                   | 1              | 0.1944                   | 1              | 0.1231                   | 1              | 0.0555               | 1                   | 0.1267               | 1                   | 0.0112               | 0.8268              |
| FGF.19    | 0.0448                   | 1              | 0.1985                   | 1              | 0.4318                   | 1              | 0.1537                   | 1              | 0.3871                   | 1              | 0.2334                   | 1              | 0.0448               | 1                   | 0.1985               | 1                   | -0.0115              | 1                   |
| FGF.21    | 0.5891                   | 1              | -0.0076                  | 1              | 0.1941                   | 1              | -0.5967                  | 1              | -0.3951                  | 1              | 0.2017                   | 1              | 0.5891               | 0.8389              | -0.0076              | 1                   | -0.0192              | 1                   |
| FIt3L     | 0.2893                   | 0.7518         | 0.3870                   | 0.5339         | 0.7881                   | 0.0085         | 0.0977                   | 1              | 0.4988                   | 0.0736         | 0.4011                   | 0.2100         | 0.2893               | 0.3868              | 0.3870               | 0.2669              | 0.0172               | 0.1007              |
| GDNF      | 0.0344                   | 1              | 0.2814                   | 1              | 0.2673                   | 1              | 0.2471                   | 0.5323         | 0.2329                   | 1              | -0.0141                  | 1              | 0.0344               | 1                   | 0.2814               | 0.5639              | 0.0077               | 0.9291              |
| HGF       | 0.2385                   | 1              | 0.4551                   | 0.5147         | 0.6111                   | 0.2010         | 0.2166                   | 1              | 0.3727                   | 0.6472         | 0.1560                   | 1              | 0.2385               | 0.8420              | 0.4551               | 0.2574              | 0.0153               | 0.3088              |
| IFN.gamma | 1.0689                   | 0.0339         | 1.3693                   | 0.0228         | 1.1962                   | 0.1075         | 0.3004                   | 1              | 0.1273                   | 1              | -0.1731                  | 1              | 1.0689               | 0.0207              | 1.3693               | 0.0114              | 0.0048               | 1                   |

| Variable       | HIV-CON                  |                | IDU-CON                  |                | DP-CON                   |                | IDU-HIV                  |                | DP-HIV                   |                | DP-IDU                   |                | HIV                  |                     | IDU                  |                     | Interaction          |                     |
|----------------|--------------------------|----------------|--------------------------|----------------|--------------------------|----------------|--------------------------|----------------|--------------------------|----------------|--------------------------|----------------|----------------------|---------------------|----------------------|---------------------|----------------------|---------------------|
|                | Mean Estimate Difference | ANCOVA p-value | Coefficient Estimate | 2-Way ANOVA p-value | Coefficient Estimate | 2-Way ANOVA p-value | Coefficient Estimate | 2-Way ANOVA p-value |
| IL.10RA        | 0.1890                   | 1              | 0.2637                   | 1              | 0.2627                   | 1              | 0.0747                   | 1              | 0.0737                   | 1              | -0.0009                  | 1              | 0.1890               | 1                   | 0.2637               | 0.8180              | -0.0004              | 1                   |
| IL.10RB        | 0.3195                   | <b>0.0437</b>  | 0.4165                   | <b>0.0256</b>  | 0.4995                   | <b>0.0080</b>  | 0.0971                   | 1              | 0.1801                   | 0.9095         | 0.0830                   | 1              | 0.3195               | <b>0.0262</b>       | 0.4165               | <b>0.0128</b>       | 0.0080               | 0.3477              |
| IL.12B         | 0.5135                   | 0.7185         | 0.2588                   | 1              | 0.5754                   | 1              | -0.2547                  | 1              | 0.0619                   | 1              | 0.3166                   | 1              | 0.5135               | 0.3702              | 0.2588               | 1                   | 0.0046               | 1                   |
| IL.15RA        | 0.3510                   | <b>0.0209</b>  | 0.2525                   | 0.4889         | 0.5817                   | <b>0.0013</b>  | -0.0985                  | 1              | 0.2307                   | 0.4124         | 0.3293                   | <b>0.0420</b>  | 0.3510               | <b>0.0133</b>       | 0.2525               | 0.2445              | 0.0037               | 1                   |
| IL.17A         | 0.5165                   | 0.0705         | 0.7398                   | <b>0.0195</b>  | 0.7332                   | <b>0.0376</b>  | 0.2232                   | 1              | 0.2166                   | 1              | -0.0066                  | 1              | 0.5165               | <b>0.0407</b>       | 0.7398               | <b>0.0097</b>       | -0.0144              | 0.2997              |
| IL.17C         | 0.6847                   | 0.2390         | 1.0939                   | <b>0.0429</b>  | 0.9402                   | 0.1859         | 0.4092                   | 0.7891         | 0.2555                   | 1              | -0.1536                  | 1              | 0.6847               | 0.1285              | 1.0939               | <b>0.0215</b>       | -0.0029              | 1                   |
| IL.18R1        | 0.3180                   | 0.8214         | 0.5002                   | 0.3173         | 0.7309                   | 0.0538         | 0.1822                   | 1              | 0.4129                   | 0.4027         | 0.2307                   | 1              | 0.3180               | 0.4215              | 0.5002               | 0.1587              | -0.0015              | 1                   |
| IL10           | 0.5726                   | 0.6461         | 0.6750                   | 0.6916         | 0.5248                   | 1              | 0.1025                   | 1              | -0.0478                  | 1              | -0.1503                  | 1              | 0.5726               | 0.3339              | 0.6750               | 0.3458              | 0.0055               | 1                   |
| IL18           | 0.8423                   | <b>0.0031</b>  | 0.5166                   | 0.4672         | 1.0593                   | <b>0.0051</b>  | -0.3257                  | 0.6001         | 0.2169                   | 1              | 0.5427                   | 0.1609         | 0.8423               | <b>0.0024</b>       | 0.5166               | 0.2336              | -0.0023              | 1                   |
| IL6            | 0.3373                   | 1              | 0.4472                   | 0.9669         | 0.6656                   | 0.3317         | 0.1099                   | 1              | 0.3283                   | 1              | 0.2184                   | 1              | 0.3373               | 0.6214              | 0.4472               | 0.4834              | 0.0160               | 0.4652              |
| IL7            | 0.0441                   | 1              | 0.0066                   | 1              | -0.2120                  | 1              | -0.0376                  | 1              | -0.2562                  | 0.7842         | -0.2186                  | 1              | 0.0441               | 1                   | 0.0066               | 1                   | 0.0049               | 1                   |
| IL8            | 0.3922                   | 1              | 1.1601                   | 0.1736         | 0.7983                   | 0.9822         | 0.7678                   | 0.1953         | 0.4061                   | 1              | -0.3617                  | 1              | 0.3922               | 1                   | 1.1601               | 0.0868              | 0.0248               | 0.5456              |
| LAP.TGF.beta.1 | -0.1408                  | 1              | -0.0613                  | 1              | 0.0079                   | 1              | 0.0795                   | 1              | 0.1486                   | 1              | 0.0691                   | 1              | -0.1408              | 1                   | -0.0613              | 1                   | 0.0058               | 1                   |
| LIF.R          | 0.1300                   | 1              | 0.2288                   | 0.2870         | 0.4489                   | <b>0.0020</b>  | 0.0988                   | 1              | 0.3190                   | <b>0.0094</b>  | 0.2202                   | 0.1356         | 0.1300               | 0.5326              | 0.2288               | 0.1435              | 0.0049               | 0.6891              |
| MCP.1          | 0.5195                   | 0.1048         | 0.5627                   | 0.2015         | 0.7253                   | 0.0673         | 0.0432                   | 1              | 0.2058                   | 1              | 0.1626                   | 1              | 0.5195               | 0.0590              | 0.5627               | 0.1008              | 0.0091               | 0.9700              |
| MCP.2          | 0.4646                   | 0.3233         | 0.1798                   | 1              | 0.5897                   | 0.3689         | -0.2848                  | 0.8798         | 0.1251                   | 1              | 0.4099                   | 0.5402         | 0.4646               | 0.1714              | 0.1798               | 1                   | 0.0052               | 1                   |
| MCP.3          | 0.3662                   | 0.3128         | 0.0319                   | 1              | 0.1913                   | 1              | -0.3342                  | 0.1841         | -0.1749                  | 1              | 0.1593                   | 1              | 0.3662               | 0.1661              | 0.0319               | 1                   | 0.0109               | 0.5163              |
| MCP.4          | -0.1049                  | 1              | -0.0854                  | 1              | -0.3524                  | 1              | 0.0195                   | 1              | -0.2474                  | 1              | -0.2670                  | 1              | -0.1049              | 1                   | -0.0854              | 1                   | 0.0289               | <b>0.0418</b>       |
| MMP.1          | 0.1499                   | 1              | -0.0625                  | 1              | 0.3351                   | 1              | -0.2124                  | 1              | 0.1852                   | 1              | 0.3976                   | 1              | 0.1499               | 1                   | -0.0625              | 1                   | 0.0126               | 1                   |
| MMP.10         | 0.0649                   | 1              | 0.4824                   | 0.9434         | 0.4614                   | 1              | 0.4175                   | 0.4289         | 0.3966                   | 1              | -0.0209                  | 1              | 0.0649               | 1                   | 0.4824               | 0.4717              | -0.0093              | 1                   |
| NT.3           | 0.1709                   | 1              | 0.0069                   | 1              | 0.1830                   | 1              | -0.1640                  | 1              | 0.0120                   | 1              | 0.1760                   | 1              | 0.1709               | 0.9330              | 0.0069               | 1                   | 0.0104               | 0.4351              |
| OPG            | 0.1597                   | 1              | 0.4766                   | 0.0860         | 0.6192                   | <b>0.0186</b>  | 0.3169                   | 0.0965         | 0.4595                   | <b>0.0389</b>  | 0.1426                   | 1              | 0.1597               | 0.9626              | 0.4766               | <b>0.0430</b>       | 0.0162               | 0.0547              |
| OSM            | 0.1274                   | 1              | 0.3934                   | 1              | 0.1494                   | 1              | 0.2660                   | 1              | 0.0220                   | 1              | -0.2440                  | 1              | 0.1274               | 1                   | 0.3934               | 0.7853              | 0.0149               | 0.6855              |
| PD.L1          | 0.2840                   | 0.6261         | 0.4190                   | 0.2854         | 0.8428                   | <b>0.0014</b>  | 0.1349                   | 1              | 0.5588                   | <b>0.0147</b>  | 0.4238                   | 0.0995         | 0.2840               | 0.3239              | 0.4190               | 0.1427              | 0.0078               | 0.8780              |
| SCF            | -0.1471                  | 1              | -0.4807                  | 0.4305         | -0.7611                  | 0.0512         | -0.3335                  | 0.3899         | -0.6140                  | 0.0511         | -0.2805                  | 1              | -0.1471              | 1                   | -0.4807              | 0.2152              | -0.0051              | 1                   |
| SIRT2          | 0.0383                   | 1              | -0.0572                  | 1              | -0.7747                  | 0.2162         | -0.0955                  | 1              | -0.8130                  | <b>0.0382</b>  | -0.7175                  | 0.0730         | 0.0383               | 1                   | -0.0572              | 1                   | 0.0093               | 1                   |
| SLAMF1         | 0.6988                   | <b>0.0006</b>  | 0.5336                   | 0.0898         | 1.0676                   | <b>0.0000</b>  | -0.1652                  | 1              | 0.3688                   | 0.3150         | 0.5340                   | <b>0.0220</b>  | 0.6988               | <b>0.0006</b>       | 0.5336               | <b>0.0449</b>       | 0.0001               | 1                   |
| ST1A1          | 0.3098                   | 1              | 0.1039                   | 1              | -0.0571                  | 1              | -0.2059                  | 1              | -0.3669                  | 1              | -0.1610                  | 1              | 0.3098               | 0.8502              | 0.1039               | 1                   | 0.0227               | 0.1931              |
| STAMBP         | 0.0880                   | 1              | 0.0007                   | 1              | -0.6540                  | 0.2024         | -0.0873                  | 1              | -0.7420                  | <b>0.0169</b>  | -0.6547                  | <b>0.0374</b>  | 0.0880               | 1                   | 0.0007               | 1                   | 0.0119               | 0.7038              |
| TGF.alpha      | 0.0839                   | 1              | 0.2131                   | 0.5898         | 0.2909                   | 0.2262         | 0.1292                   | 0.8276         | 0.2070                   | 0.3999         | 0.0778                   | 1              | 0.0839               | 1                   | 0.2131               | 0.2949              | 0.0107               | 0.0597              |
| TNF            | 0.6380                   | <b>0.0095</b>  | 0.5907                   | 0.0971         | 0.8567                   | <b>0.0072</b>  | -0.0474                  | 1              | 0.2186                   | 1              | 0.2660                   | 1              | 0.6380               | <b>0.0065</b>       | 0.5907               | <b>0.0485</b>       | 0.0020               | 1                   |
| TNFB           | 0.4310                   | 0.1129         | 0.5945                   | <b>0.0475</b>  | 0.6247                   | 0.0556         | 0.1635                   | 1              | 0.1937                   | 1              | 0.0301                   | 1              | 0.4310               | 0.0632              | 0.5945               | <b>0.0238</b>       | -0.0039              | 1                   |
| TNFRSF9        | 0.7191                   | <b>0.0020</b>  | 0.5175                   | 0.1986         | 0.8942                   | <b>0.0039</b>  | -0.2015                  | 1              | 0.1751                   | 1              | 0.3767                   | 0.3694         | 0.7191               | <b>0.0017</b>       | 0.5175               | 0.0993              | 0.0044               | 1                   |
| TNFSF14        | 0.2851                   | 0.9167         | 0.4125                   | 0.5178         | 0.5002                   | 0.3316         | 0.1273                   | 1              | 0.2150                   | 1              | 0.0877                   | 1              | 0.2851               | 0.4691              | 0.4125               | 0.2589              | 0.0115               | 0.5189              |
| TRAIL          | 0.3529                   | <b>0.0223</b>  | 0.2637                   | 0.4349         | 0.6153                   | <b>0.0007</b>  | -0.0892                  | 1              | 0.2624                   | 0.2454         | 0.3516                   | <b>0.0273</b>  | 0.3529               | <b>0.0141</b>       | 0.2637               | 0.2175              | -0.0015              | 1                   |
| TRANCE         | 0.0457                   | 1              | -0.5343                  | 0.3977         | -0.2964                  | 1              | -0.5800                  | <b>0.0222</b>  | -0.3421                  | 1              | 0.2379                   | 1              | 0.0457               | 1                   | -0.5343              | 0.1989              | -0.0209              | 0.1282              |
| TWEAK          | -0.1128                  | 1              | -0.0919                  | 1              | -0.1406                  | 1              | 0.0209                   | 1              | -0.0279                  | 1              | -0.0487                  | 1              | -0.1128              | 1                   | -0.0919              | 1                   | -0.0004              | 1                   |
| uPA            | 0.2074                   | 1              | 0.5059                   | 0.0611         | 0.7728                   | <b>0.0015</b>  | 0.2985                   | 0.1465         | 0.5654                   | <b>0.0055</b>  | 0.2669                   | 0.5966         | 0.2074               | 0.6081              | 0.5059               | <b>0.0306</b>       | 0.0041               | 1                   |
| VEGFA          | 0.2666                   | 0.2656         | 0.3894                   | 0.0943         | 0.5284                   | <b>0.0139</b>  | 0.1227                   | 1              | 0.2618                   | 0.3673         | 0.1391                   | 1              | 0.2666               | 0.1421              | 0.3894               | <b>0.0471</b>       | 0.0089               | 0.3404              |

| Variable                | HIV-CON                  |                | IDU-CON                  |                | DP-CON                   |                | IDU-HIV                  |                | DP-HIV                   |                | DP-IDU                   |                | HIV                  |                     | IDU                  |                     | Interaction          |                     |
|-------------------------|--------------------------|----------------|--------------------------|----------------|--------------------------|----------------|--------------------------|----------------|--------------------------|----------------|--------------------------|----------------|----------------------|---------------------|----------------------|---------------------|----------------------|---------------------|
|                         | Mean Estimate Difference | ANCOVA p-value | Coefficient Estimate | 2-Way ANOVA p-value | Coefficient Estimate | 2-Way ANOVA p-value | Coefficient Estimate | 2-Way ANOVA p-value |
| Granulocytes            | -0.0309                  | 1              | 0.0123                   | 1              | 0.0258                   | 1              | 0.0432                   | 1              | 0.0567                   | 1              | 0.0135                   | 1              | -0.0309              | 1                   | 0.0123               | 1                   | 0.0023               | 0.7495              |
| Neutrophils             | 0.0001                   | 1              | 0.0484                   | 1              | 0.0809                   | 0.9788         | 0.0483                   | 1              | 0.0808                   | 0.6281         | 0.0325                   | 1              | 0.0001               | 1                   | 0.0484               | 1                   | 0.0002               | 1                   |
| Eosinophils             | 0.0121                   | 1              | -0.0337                  | 1              | -0.0638                  | 1              | -0.0457                  | 1              | -0.0758                  | 0.6816         | -0.0301                  | 1              | 0.0121               | 1                   | -0.0337              | 1                   | 0.0001               | 1                   |
| Basophils               | -0.0012                  | 1              | -0.0032                  | 1              | -0.0065                  | 0.0618         | -0.0021                  | 1              | -0.0053                  | 0.0838         | -0.0033                  | 0.6613         | -0.0012              | 1                   | -0.0032              | 0.5584              | 0.0000               | 1                   |
| Lymphocytes             | 0.0376                   | 1              | -0.0097                  | 1              | -0.0226                  | 1              | -0.0474                  | 1              | -0.0602                  | 1              | -0.0128                  | 1              | 0.0376               | 1                   | -0.0097              | 1                   | -0.0027              | 0.5030              |
| Total B Cells           | -0.0063                  | 1              | -0.0188                  | 1              | -0.0036                  | 1              | -0.0124                  | 1              | 0.0027                   | 1              | 0.0152                   | 1              | -0.0063              | 1                   | -0.0188              | 1                   | -0.0011              | 0.7080              |
| Naive B Cells           | -0.0605                  | 1              | -0.1902                  | 0.1483         | -0.1026                  | 1              | -0.1297                  | 0.2606         | -0.0421                  | 1              | 0.0876                   | 1              | -0.0605              | 1                   | -0.1902              | 0.0742              | 0.0011               | 1                   |
| Total Memory B Cells    | 0.0602                   | 1              | 0.1877                   | 0.1581         | 0.1014                   | 1              | 0.1276                   | 0.2792         | 0.0412                   | 1              | -0.0863                  | 1              | 0.0602               | 1                   | 0.1877               | 0.0791              | -0.0012              | 1                   |
| Naive B Cells IgD (-/+) | -0.0564                  | 1              | -0.1867                  | 0.1540         | -0.1009                  | 1              | -0.1302                  | 0.2416         | -0.0445                  | 1              | 0.0858                   | 1              | -0.0564              | 1                   | -0.1867              | 0.0770              | 0.0009               | 1                   |
| IgD- Memory B Cells     | 0.0719                   | 0.4696         | 0.1440                   | <b>0.0365</b>  | 0.0846                   | 0.6595         | 0.0720                   | 0.3937         | 0.0127                   | 1              | -0.0594                  | 0.9877         | 0.0719               | 0.2535              | 0.1440               | <b>0.0182</b>       | 0.0000               | 1                   |
| Total Monocytes         | -0.0389                  | 1              | -0.0088                  | 1              | -0.0056                  | 1              | 0.0301                   | 1              | 0.0333                   | 1              | 0.0032                   | 1              | -0.0389              | 0.7320              | -0.0088              | 1                   | 0.0000               | 1                   |
| Classical Monocytes     | -0.0083                  | 1              | 0.0022                   | 1              | 0.0210                   | 1              | 0.0104                   | 1              | 0.0293                   | 1              | 0.0188                   | 1              | -0.0083              | 1                   | 0.0022               | 1                   | -0.0027              | 0.1412              |
| Transitional Monocytes  | 0.0101                   | 1              | 0.0065                   | 1              | -0.0058                  | 1              | -0.0036                  | 1              | -0.0159                  | 1              | -0.0123                  | 1              | 0.0101               | 1                   | 0.0065               | 1                   | 0.0006               | 0.8231              |
| Nonclassical Monocytes  | 0.0114                   | 1              | -0.0009                  | 1              | -0.0051                  | 1              | -0.0123                  | 1              | -0.0164                  | 1              | -0.0041                  | 1              | 0.0114               | 1                   | -0.0009              | 1                   | 0.0011               | 0.5499              |
| Total NK                | -0.0040                  | 1              | 0.0236                   | 1              | -0.0243                  | 1              | 0.0276                   | 0.5211         | -0.0202                  | 1              | -0.0479                  | <b>0.0499</b>  | -0.0040              | 1                   | 0.0236               | 0.7838              | 0.0000               | 1                   |
| Late NKs                | 0.2683                   | <b>0.0262</b>  | 0.2166                   | 0.4026         | 0.2128                   | 0.4864         | -0.0517                  | 1              | -0.0556                  | 1              | -0.0039                  | 1              | 0.2683               | <b>0.0191</b>       | 0.2166               | 0.2013              | -0.0007              | 1                   |
| Early NKs               | -0.2670                  | <b>0.0271</b>  | -0.2153                  | 0.4100         | -0.2115                  | 0.4942         | 0.0517                   | 1              | 0.0554                   | 1              | 0.0038                   | 1              | -0.2670              | <b>0.0196</b>       | -0.2153              | 0.2050              | 0.0008               | 1                   |
| Total T Cells           | 0.0476                   | 0.8370         | 0.0158                   | 1              | 0.0310                   | 1              | -0.0317                  | 1              | -0.0165                  | 1              | 0.0152                   | 1              | 0.0476               | 0.4377              | 0.0158               | 1                   | 0.0012               | 1                   |
| Gamma Delta T Cells     | -0.0132                  | 1              | -0.0027                  | 1              | -0.0277                  | 1              | 0.0105                   | 1              | -0.0145                  | 1              | -0.0250                  | 1              | -0.0132              | 1                   | -0.0027              | 1                   | 0.0007               | 0.9768              |
| MAIT/NKT Cells          | -0.0368                  | <b>0.0213</b>  | -0.0081                  | 1              | -0.0092                  | 1              | 0.0287                   | 0.1130         | 0.0276                   | 0.2941         | -0.0011                  | 1              | -0.0368              | <b>0.0160</b>       | -0.0081              | 1                   | -0.0006              | 0.7246              |
| CD3+ ab T cells         | 0.0050                   | 1              | 0.0044                   | 1              | 0.0253                   | 1              | -0.0006                  | 1              | 0.0203                   | 1              | 0.0210                   | 1              | 0.0050               | 1                   | 0.0044               | 1                   | -0.0007              | 1                   |
| CD4 ab T Cells          | -0.2467                  | <b>0.0000</b>  | -0.0534                  | 1              | -0.2232                  | <b>0.0039</b>  | 0.1933                   | <b>0.0010</b>  | 0.0235                   | 1              | -0.1698                  | <b>0.0122</b>  | -0.2467              | <b>0.0000</b>       | -0.0534              | 1                   | -0.0009              | 1                   |
| Th1-like                | 0.0051                   | 1              | 0.0204                   | 1              | -0.0067                  | 1              | 0.0153                   | 1              | -0.0118                  | 1              | -0.0270                  | 0.5136         | 0.0051               | 1                   | 0.0204               | 0.8210              | 0.0008               | 0.5314              |
| Th17-like               | 0.0116                   | 1              | 0.0244                   | 1              | 0.0264                   | 1              | 0.0127                   | 1              | 0.0148                   | 1              | 0.0021                   | 1              | 0.0116               | 1                   | 0.0244               | 0.7650              | -0.0003              | 1                   |
| Th2-like                | 0.0060                   | 1              | -0.0105                  | 1              | -0.0122                  | 1              | -0.0166                  | 1              | -0.0183                  | 1              | -0.0017                  | 1              | 0.0060               | 1                   | -0.0105              | 1                   | 0.0005               | 1                   |
| Treg                    | 0.0058                   | 1              | 0.0027                   | 1              | 0.0170                   | 0.2494         | -0.0031                  | 1              | 0.0112                   | 0.7013         | 0.0143                   | 0.2144         | 0.0058               | 1                   | 0.0027               | 1                   | 0.0002               | 1                   |
| CD4 Terminal Effectors  | 0.0506                   | 0.1372         | 0.1203                   | <b>0.0003</b>  | 0.0751                   | 0.0548         | 0.0697                   | <b>0.0094</b>  | 0.0245                   | 1              | -0.0452                  | 0.3247         | 0.0506               | 0.0818              | 0.1203               | <b>0.0002</b>       | 0.0019               | 0.1373              |
| CD4 Effector Memory     | -0.0267                  | 1              | 0.0221                   | 1              | 0.0282                   | 1              | 0.0488                   | 1              | 0.0549                   | 1              | 0.0061                   | 1              | -0.0267              | 1                   | 0.0221               | 1                   | 0.0022               | 0.9362              |
| CD4 Central Memory      | 0.0016                   | 1              | 0.0786                   | 0.2523         | 0.0193                   | 1              | 0.0769                   | 0.0595         | 0.0177                   | 1              | -0.0592                  | 0.3986         | 0.0016               | 1                   | 0.0786               | 0.1261              | -0.0026              | 0.1311              |
| CD4 Naive               | -0.0180                  | 1              | -0.1225                  | 0.4054         | -0.1028                  | 0.8209         | -0.1044                  | 0.2500         | -0.0847                  | 0.9187         | 0.0197                   | 1              | -0.0180              | 1                   | -0.1225              | 0.2027              | -0.0034              | 0.3774              |
| Activated CD4 T cells   | 0.0246                   | 0.3835         | 0.0082                   | 1              | 0.0632                   | <b>0.0015</b>  | -0.0164                  | 1              | 0.0385                   | 0.0555         | 0.0549                   | <b>0.0012</b>  | 0.0246               | 0.2098              | 0.0082               | 1                   | 0.0002               | 1                   |
| CD8 ab T Cells          | 0.2691                   | <b>0.0000</b>  | 0.0365                   | 1              | 0.2330                   | <b>0.0001</b>  | -0.2326                  | <b>0.0000</b>  | -0.0361                  | 1              | 0.1965                   | <b>0.0002</b>  | 0.2691               | <b>0.0000</b>       | 0.0365               | 1                   | -0.0001              | 1                   |
| CD8 Terminal Effector   | 0.0862                   | 1              | 0.0484                   | 1              | 0.1556                   | 0.8013         | -0.0378                  | 1              | 0.0694                   | 1              | 0.1072                   | 1              | 0.0862               | 0.8607              | 0.0484               | 1                   | 0.0023               | 1                   |
| CD8 Effector Memory     | -0.0253                  | 1              | 0.0300                   | 1              | 0.0120                   | 1              | 0.0554                   | 1              | 0.0373                   | 1              | -0.0181                  | 1              | -0.0253              | 1                   | 0.0300               | 1                   | 0.0081               | <b>0.0211</b>       |
| CD8 Naive               | -0.0623                  | 1              | -0.0804                  | 1              | -0.1633                  | 0.8323         | -0.0180                  | 1              | -0.1010                  | 1              | -0.0829                  | 1              | -0.0623              | 1                   | -0.0804              | 1                   | -0.0103              | <b>0.0145</b>       |
| Activated CD8+ T cells  | 0.0804                   | 0.1888         | 0.0203                   | 1              | 0.0859                   | 0.4549         | -0.0601                  | 0.5531         | 0.0056                   | 1              | 0.0657                   | 0.5661         | 0.0804               | 0.1093              | 0.0203               | 1                   | 0.0007               | 1                   |
| TEMRA CD8+ T cells      | 0.0586                   | 1              | 0.0356                   | 1              | 0.0540                   | 1              | -0.0230                  | 1              | -0.0046                  | 1              | 0.0184                   | 1              | 0.0586               | 1                   | 0.0356               | 1                   | 0.0031               | 0.9640              |

## 3 Supplementary Figures

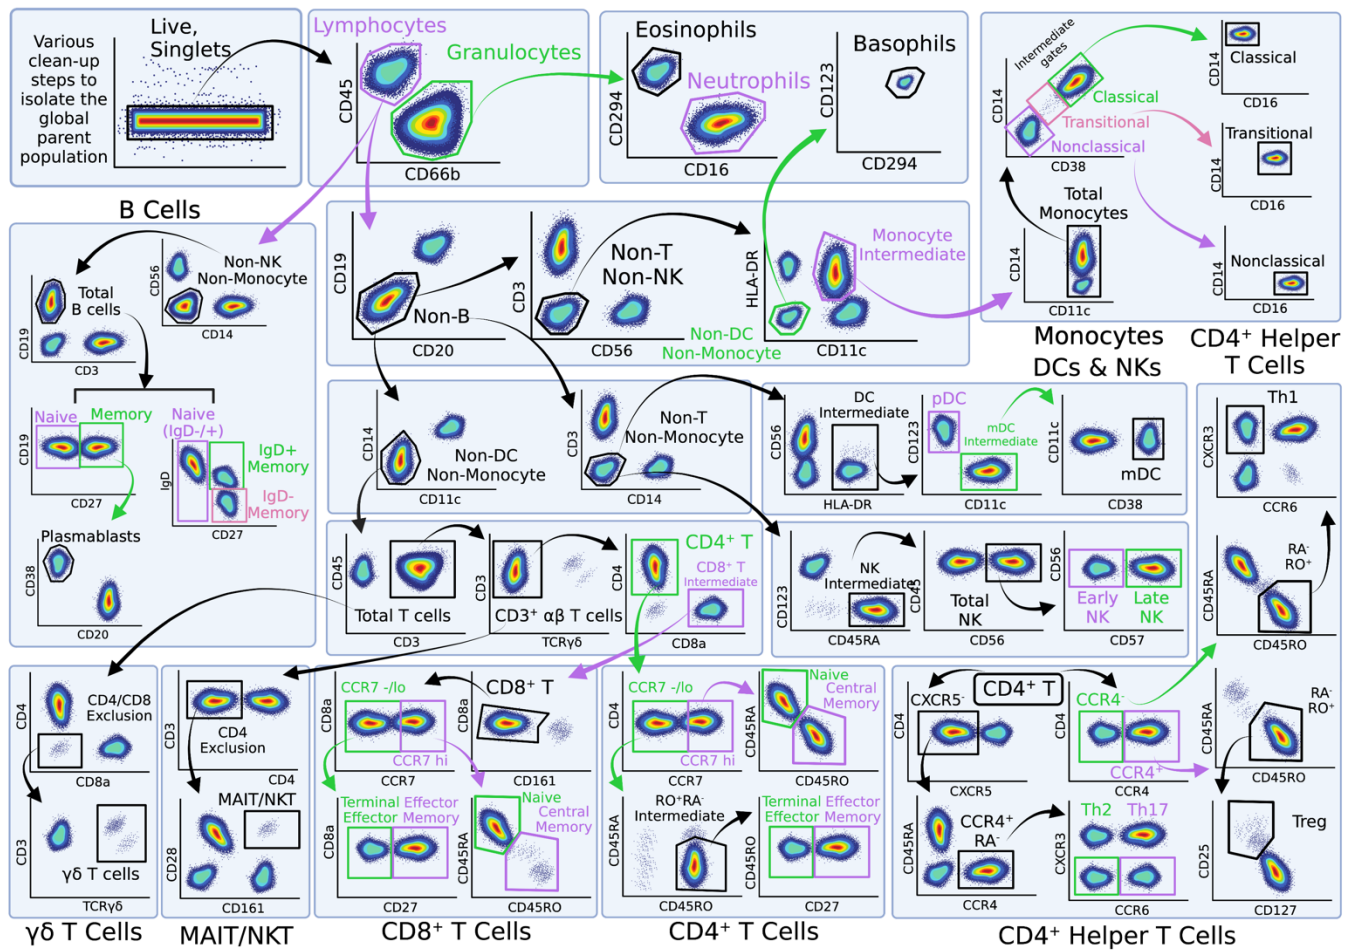

**Supplementary Figure S1. Gating strategy for Maxpar Direct Immune Profiling Assay.** The representative plots demonstrate the various gates applied to quantify the number of cells from each immune cell type, where the arrows designate the input population into each plot. Created with BioRender.com.

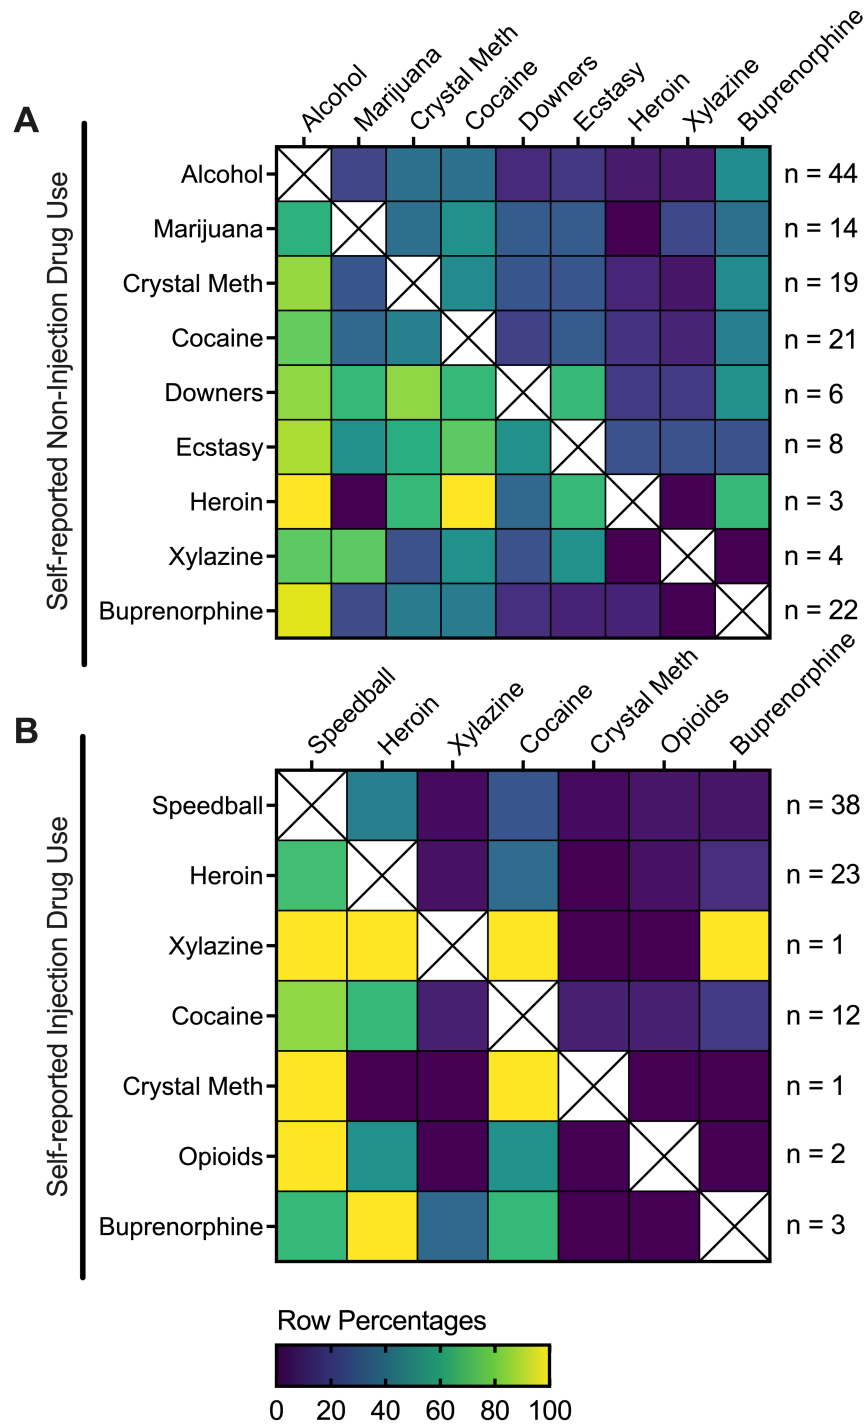

**Supplementary Figure S2. Drug co-occurrence across the 97 participants.** Frequencies of co-occurrence based on self-report of (A) non-injection drug use and (B) injection drug use in the last 12 months were calculated for each drug of interest.



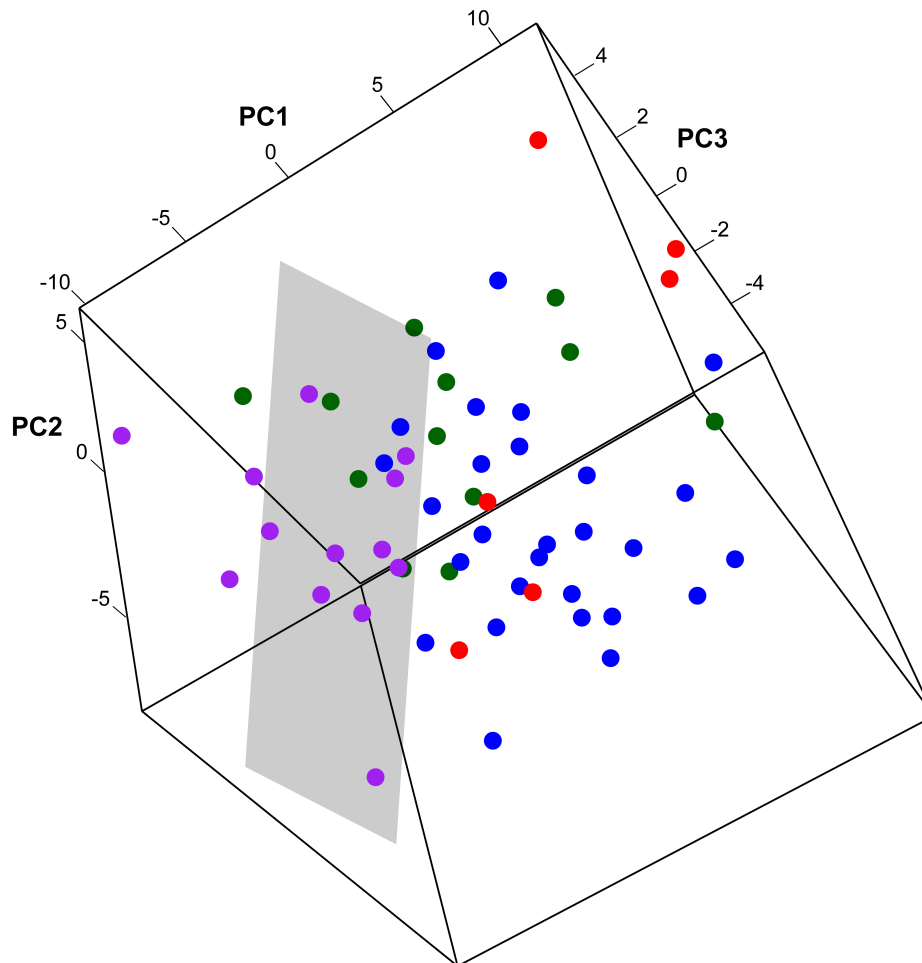

**Supplementary Figure S3. 3D projected principal component analysis of inflammatory mediators and cellular immunophenotypes.** With the combined inputs of Bridge normalized NPX values from Olink Target 96 Inflammation Panel and the percent of lineage parent population for each of 37 immune cell types, principal component analysis (PCA) was performed and projected in 3-dimensions. The input data was standardized and centered. The individuals are colored by group (HIV: HIV<sup>+</sup>/PWID<sup>-</sup>, IDU: HIV<sup>-</sup>/PWID<sup>+</sup>, DP: HIV<sup>+</sup>/PWID<sup>+</sup>, CON: HIV<sup>-</sup>/PWID<sup>-</sup>). A gray hyperplane was drawn to demonstrate the segregation of the control group from the other groups. Generated using the R package, rgl v1.0.1.

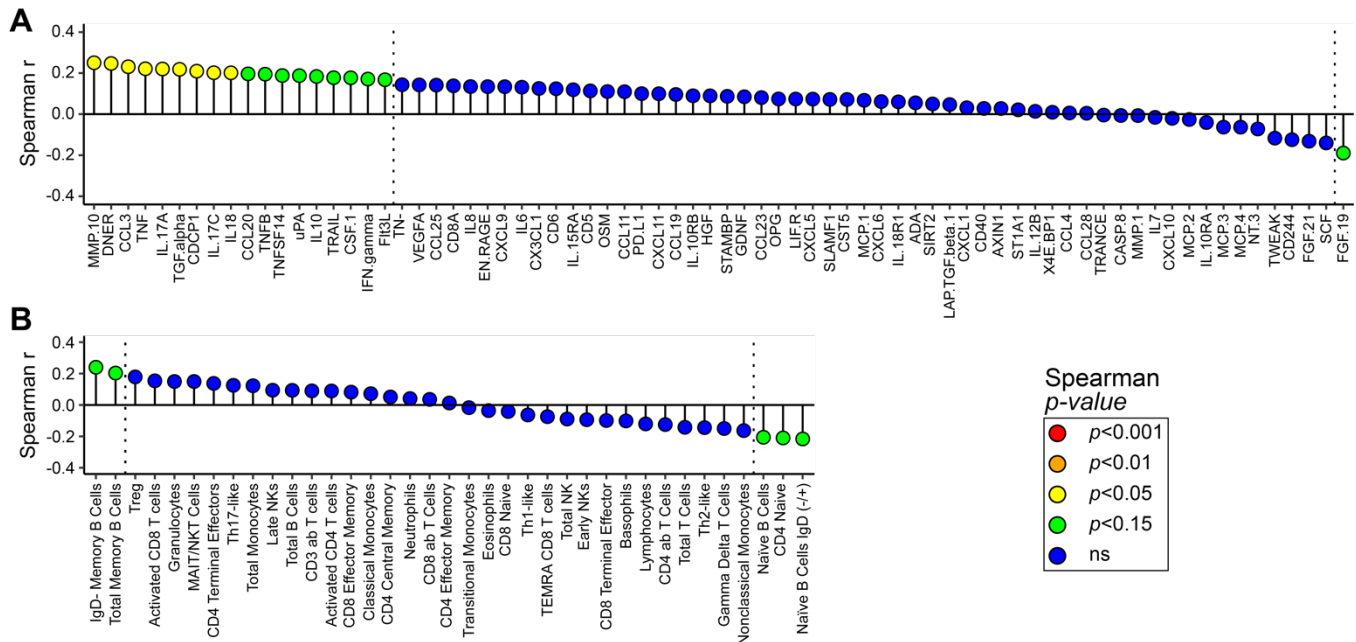

**Supplementary Figure S4. Correlations of inflammatory mediators and cellular immunophenotypes with the degree of poly-substance use.** Spearman correlations of the (A) bridge normalized NPX values for the 74 inflammatory mediators and (B) 37 immune cell types represented as the frequency of lineage parent were calculated after adjusting for age, homeless in the last year or now, male identity, married, employed, and some college experience. The y-axis represents the partial correlation coefficient, while the color of the point represents the  $p$ -value of the spearman correlation. Generated using the R package, ggplot2 v3.3.6.

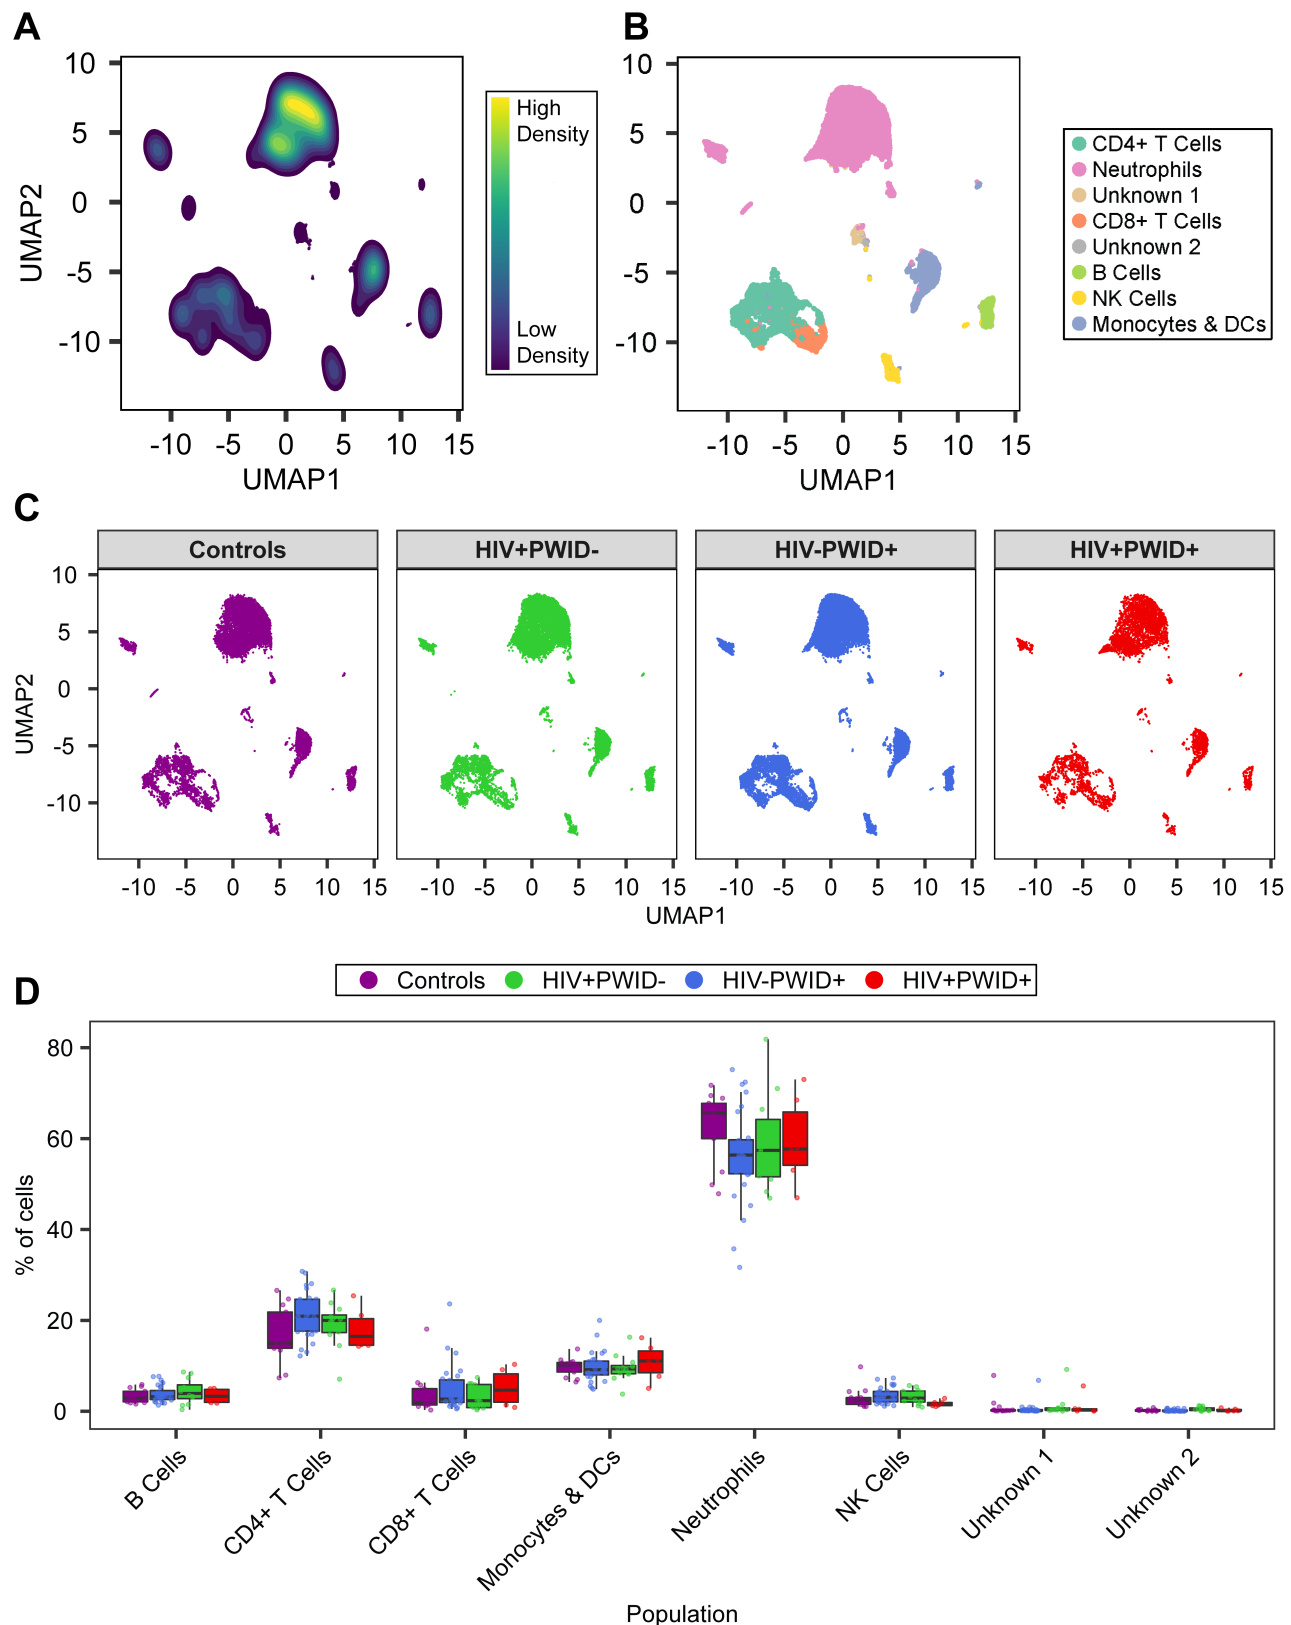

**Supplementary Figure S5. Clustering of mass cytometry data validated bivariate gating strategy.** The immunoCluster R package was used to perform (A) uniform manifold approximation and projection (UMAP) data reduction and (B) self-organizing maps (SOM) with consensus clustering (k=8). The cluster identities were estimated based on cell-marker levels within the clusters when possible. The UMAP projections were (C) split into cohorts and (D) quantified as percent of live cells per sample. Generated using the ImmunoCluster program (<https://github.com/kordastilab/ImmunoCluster>).

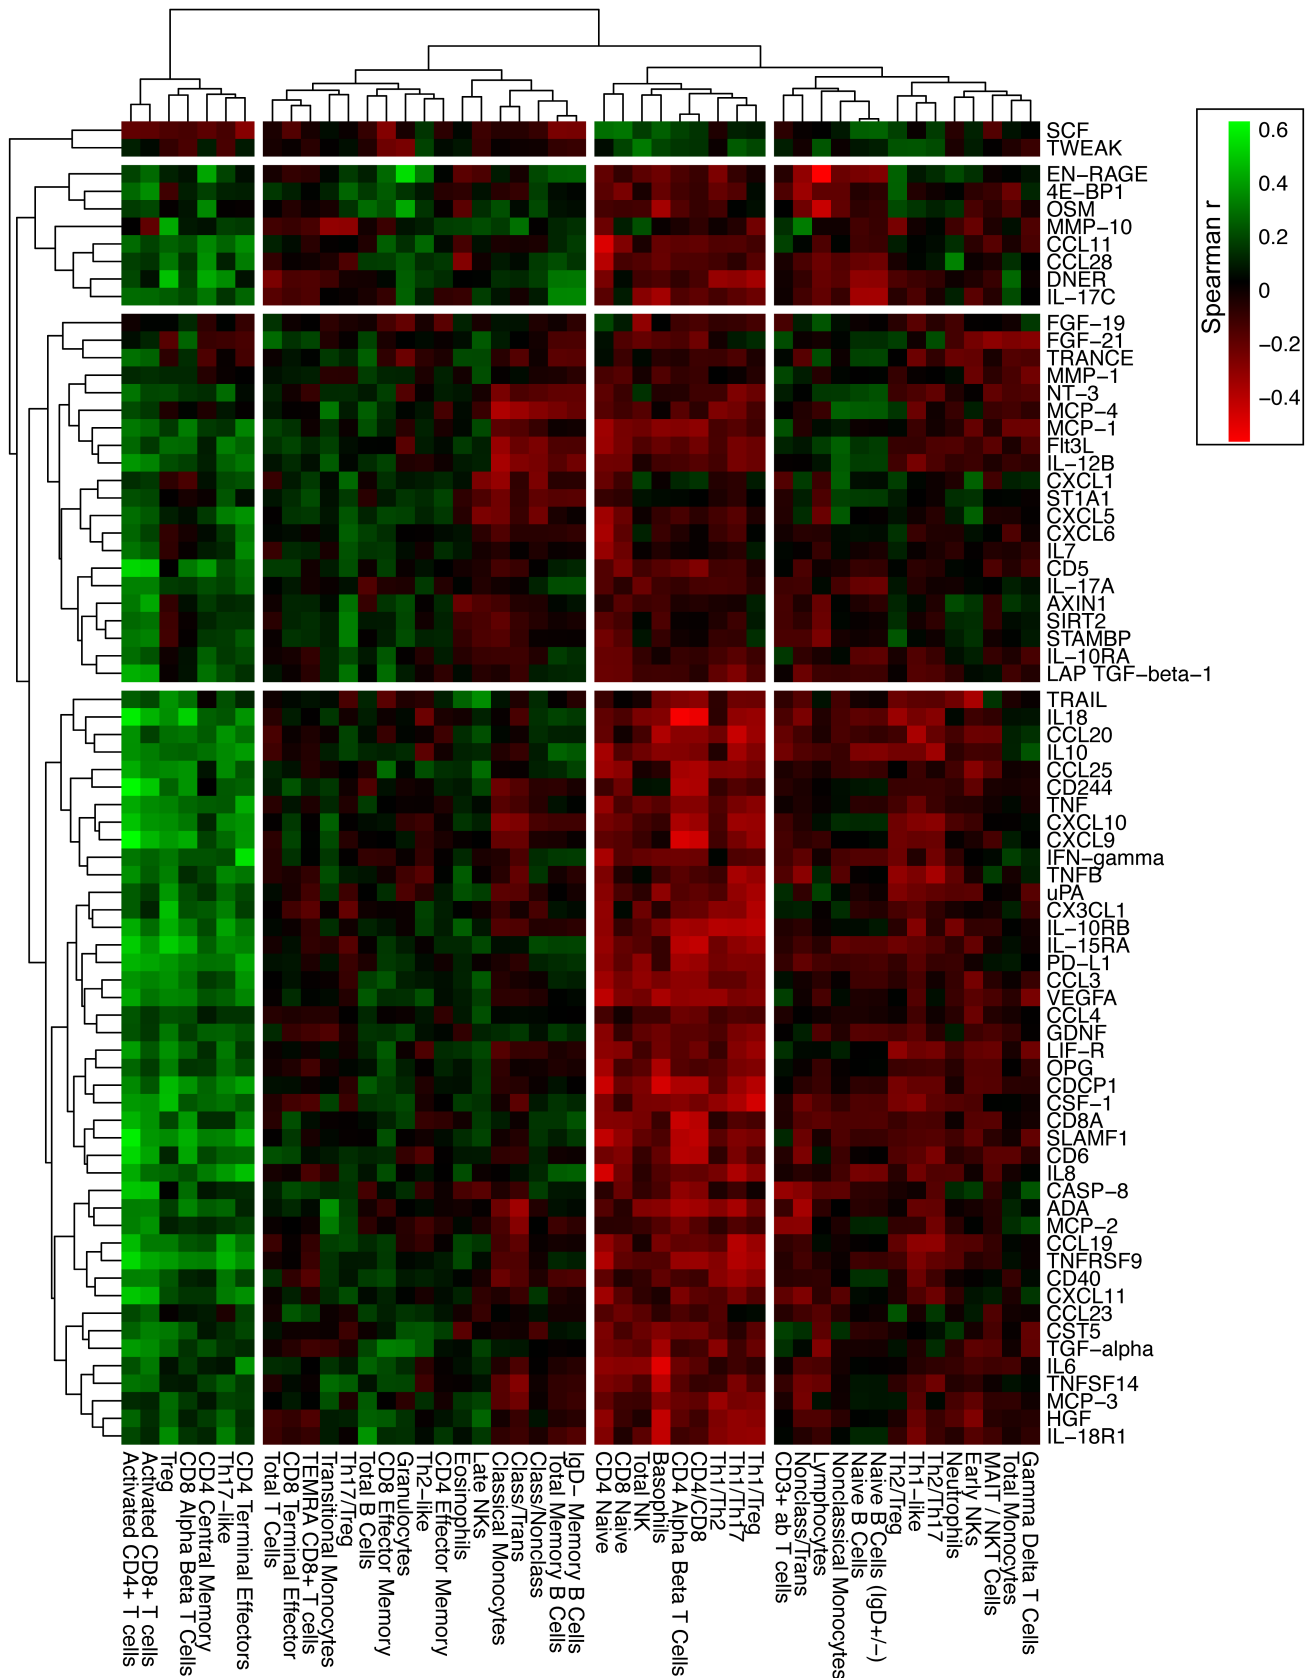

**Supplementary Figure S6. Correlations of inflammatory mediators with cellular immunophenotypes.** The color of the cell represents the spearman correlation of the given inflammatory mediator and the ratio or frequency of the given cell type, as denoted by the legend. Generated using the R package, pheatmap v1.0.12.
